# Supplementary material for: Membrane-Induced Dichotomous Conformation of Amyloid β with the Disordered N-Terminal Segment Followed by the Stable C-Terminal β Structure
Source: PubMed Central journal article supplement (PMC4701388; doi:10.1371/journal.pone.0146405), 2016-01-05
Supplement: pone.0146405.s001.pdf [file pone.0146405.s001.pdf]

**Figure S1**

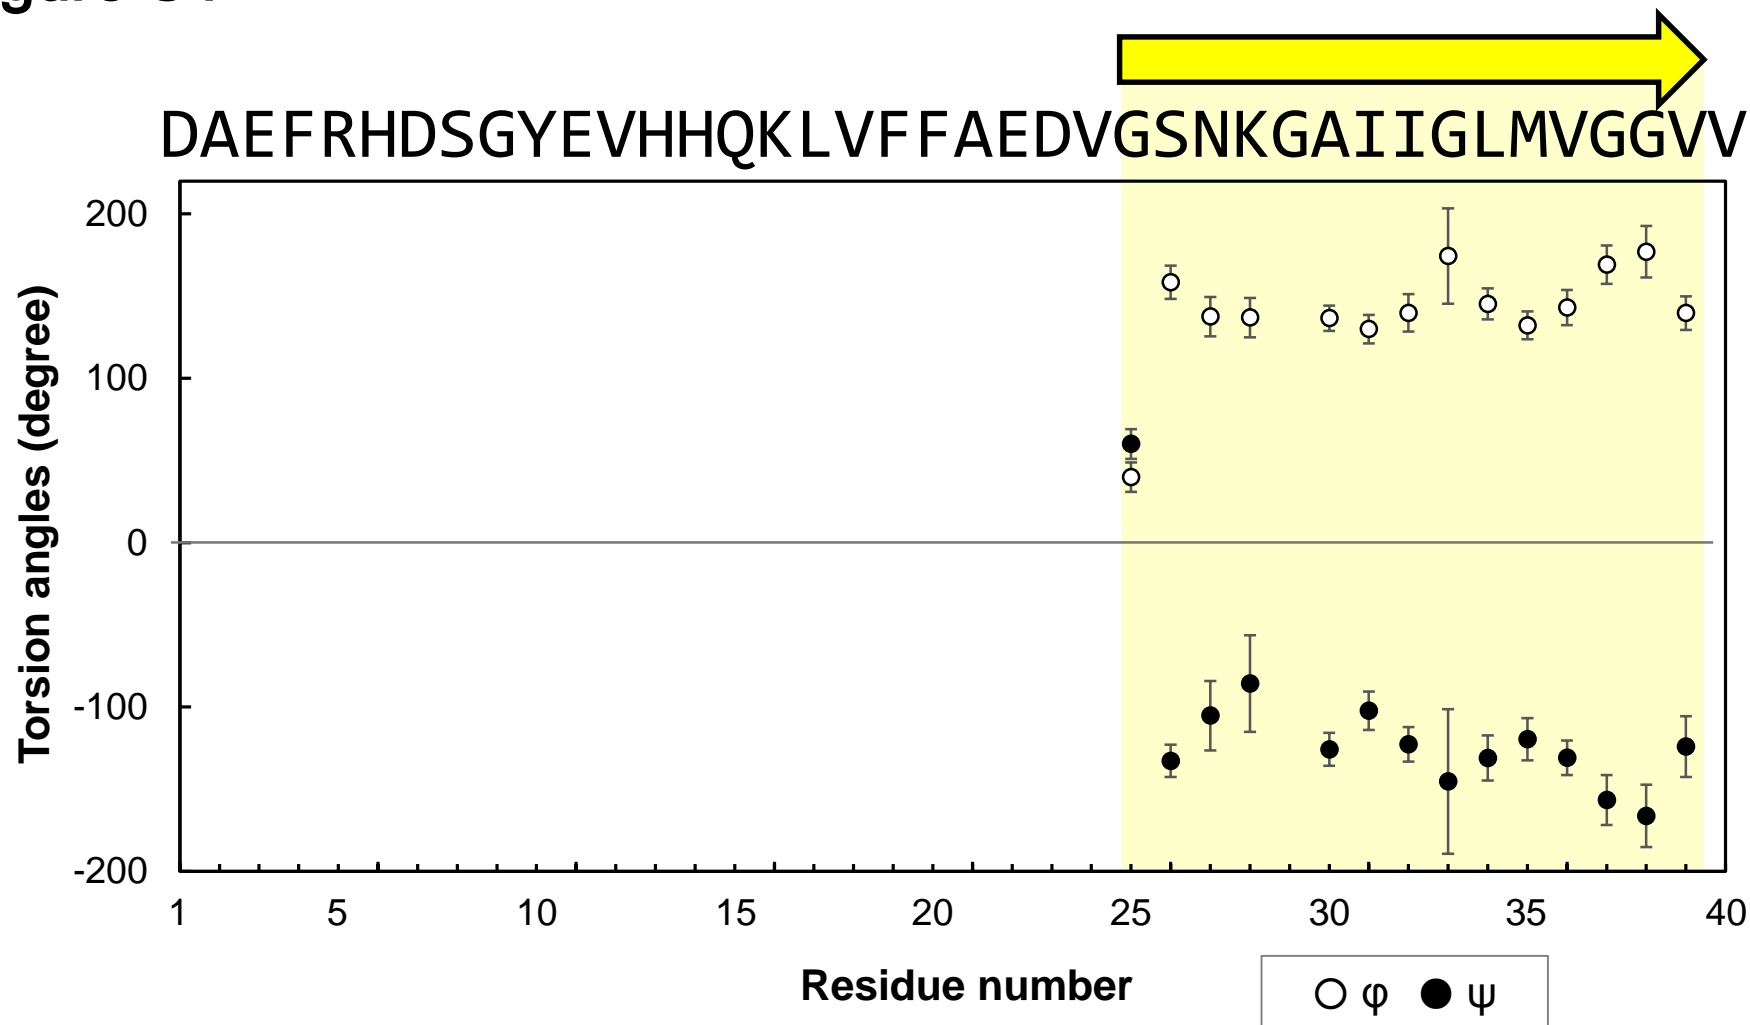

**Figure S1**

Dihedral angles ( $\phi$ ,  $\psi$ ) obtained by *TALOS-N* analysis according to  $^{13}\text{C}$  and  $^{15}\text{N}$  chemical shifts of  $\text{A}\beta(1-40)$  bound to DMPC MLVs. The secondary structure analysis by the TALOS software indicated a  $\beta$ -strand region (yellow shadow and yellow arrows) at the residues of Gly25-Val39. The chemical shift references were corrected before analyses of *TALOS-N*.
