# Supplementary material for: Membrane-Induced Dichotomous Conformation of Amyloid β with the Disordered N-Terminal Segment Followed by the Stable C-Terminal β Structure
Source: PubMed Central journal article supplement (PMC4701388; doi:10.1371/journal.pone.0146405), 2016-01-05
Supplement: pone.0146405.s002.pdf [file pone.0146405.s002.pdf]

# Figure S2

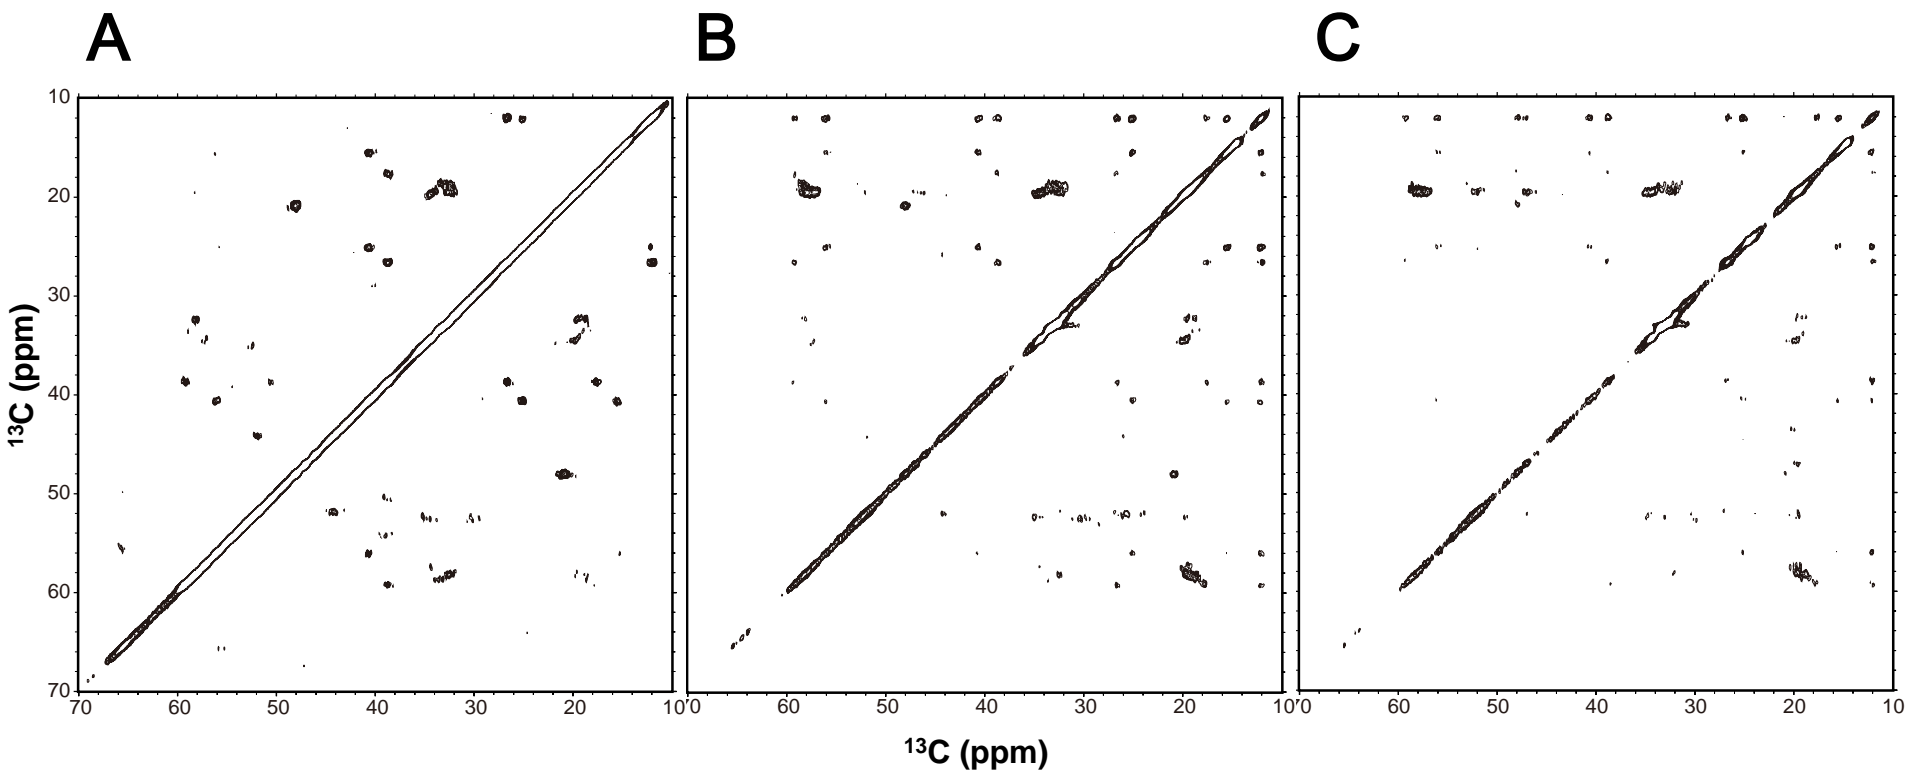

## Figure S2

Solid-state NMR  $^{13}\text{C}$  homonuclear through-space correlation spectra of [U- $^{13}\text{C}$ ,  $^{15}\text{N}$ ] A $\beta$ (1-40) bound to DMPC MLVs acquired by DARR/RAD with mixing times of (A) 4 ms, (B) 200 ms, and (C) 400 ms, respectively. All measurements were performed at 20°C for the sample (DMPC/A $\beta$ (1-40) molar ratio = 10/1) in lyophilized and dry state.
